# Supplementary material for: An electrical/thermal dual-controlled quad-functional terahertz metasurface absorber
Source: Royal Society of Chemistry journal article supplement (doi:10.1039/d3cp01275a), 2023-01-01
Supplement: d3cp01275a1.pdf [file d3cp01275a1.pdf]

## Electrical/thermal dual-controlled quad-functional terahertz metasurface absorber: Supplementary Materials

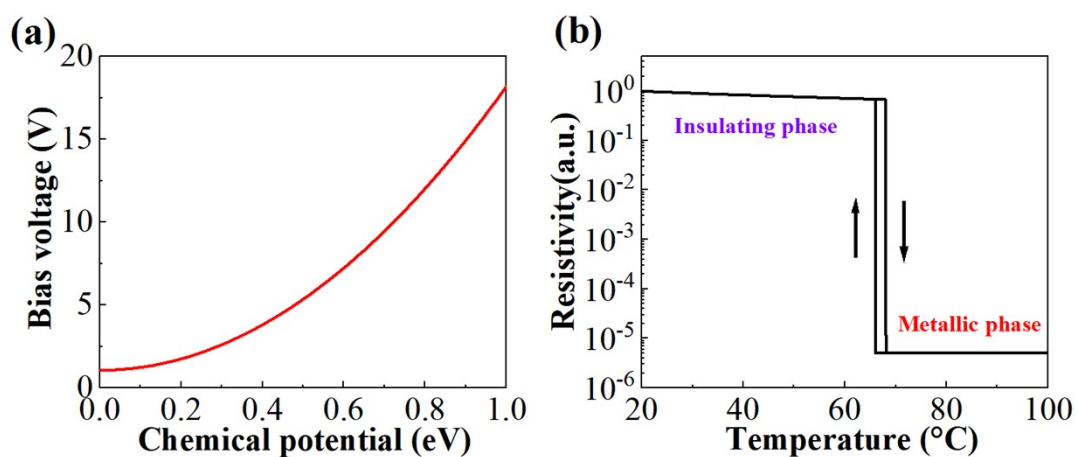

Fig. S1. (a) Chemical potential as a function of applied external voltage. (b) The resistivity of VO<sub>2</sub> as a function of Temperature.

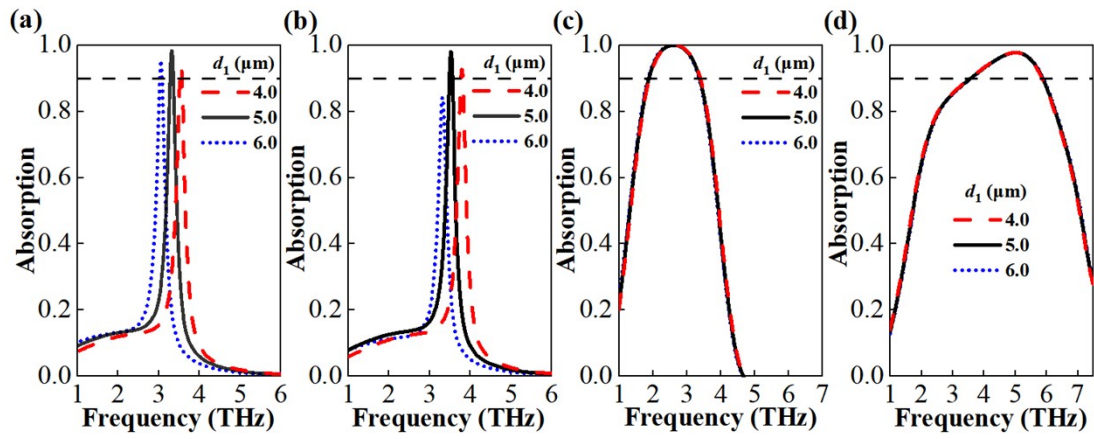

**Fig. S2:** Absorption spectra of QMA with different parameters  $d_1$  for the four modes of (a) "L-NAM", (b) "H-NAM", (c) "L-BAM", and (d) "H-BAM".

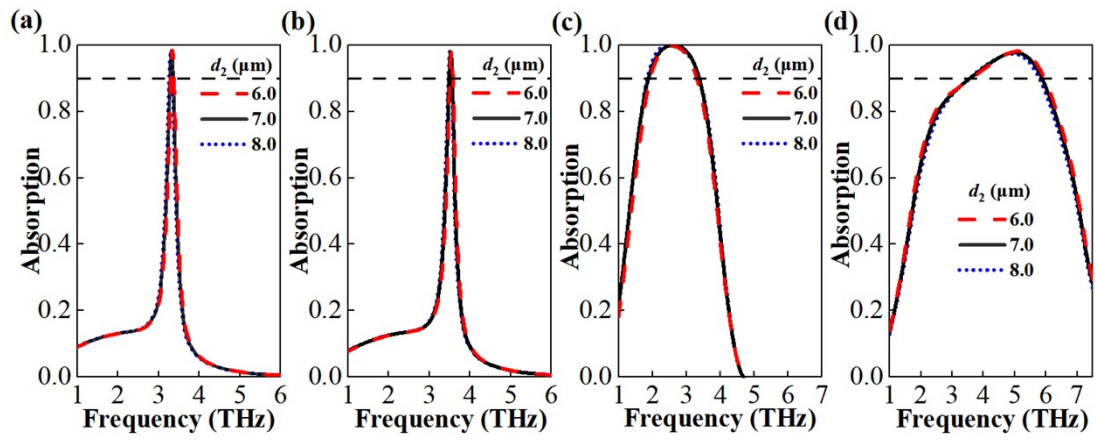

**Fig. S3:** Absorption spectra of QMA with different parameters  $d_2$  for the four modes of (a) "L-NAM", (b) "H-NAM", (c) "L-BAM", and (d) "H-BAM".

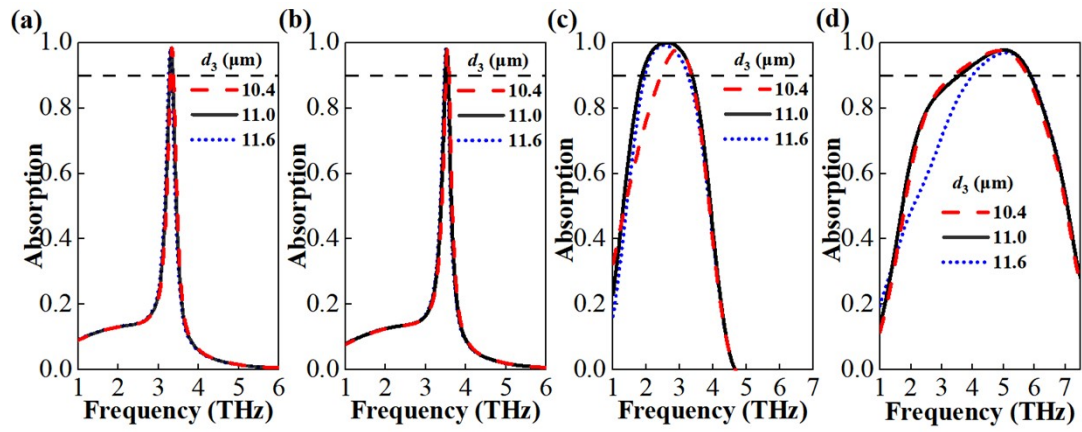

**Fig. S4:** Absorption spectra of QMA with different parameters  $d_3$  for the four modes of (a) “L-NAM”, (b) “H-NAM”, (c) “L-BAM”, and (d) “H-BAM”.

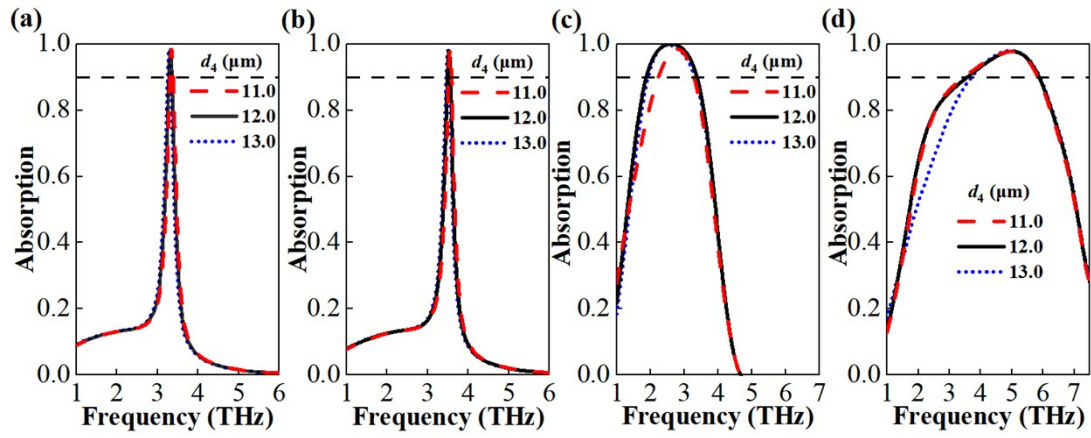

**Fig. S5:** Absorption spectra of QMA with different parameters  $d_4$  for the four modes of (a) "L-NAM", (b) "H-NAM", (c) "L-BAM", and (d) "H-BAM".

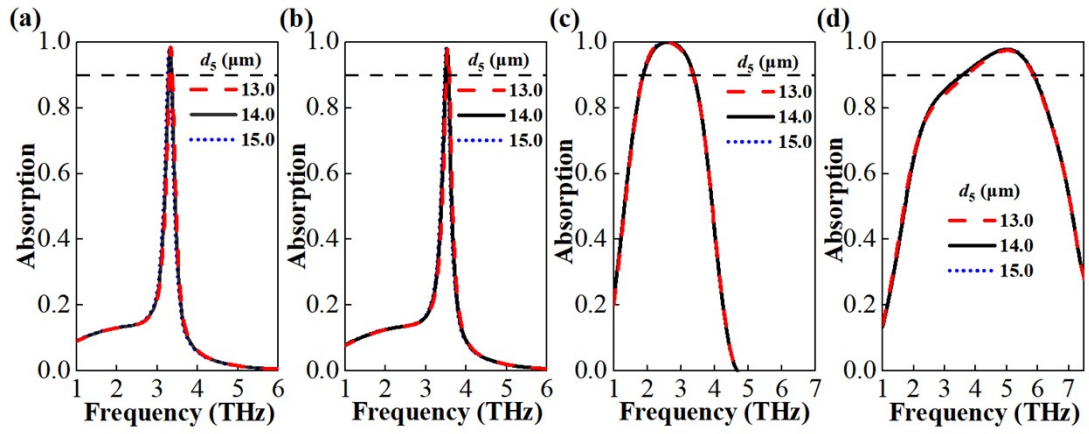

**Fig. S6:** Absorption spectra of QMA with different parameters  $d_5$  for the four modes of (a) "L-NAM", (b) "H-NAM", (c) "L-BAM", and (d) "H-BAM".

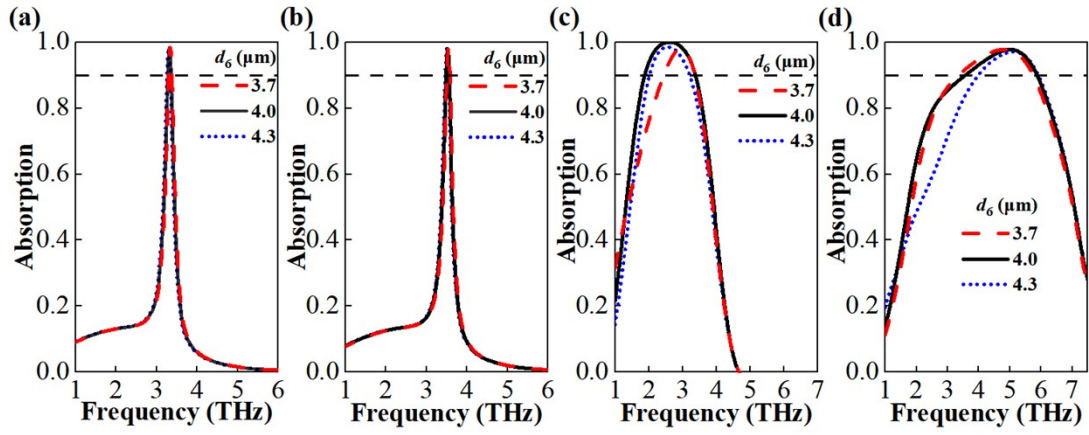

**Fig. S7:** Absorption spectra of QMA with different parameters  $d_6$  for the four modes of (a) "L-NAM", (b) "H-NAM", (c) "L-BAM", and (d) "H-BAM".
